# Supplementary material for: Novel drug targets in cell wall biosynthesis exploited by gene disruption in Pseudomonas aeruginosa
Source: PubMed Central journal article supplement (PMC5646862; doi:10.1371/journal.pone.0186801), 2017-10-18

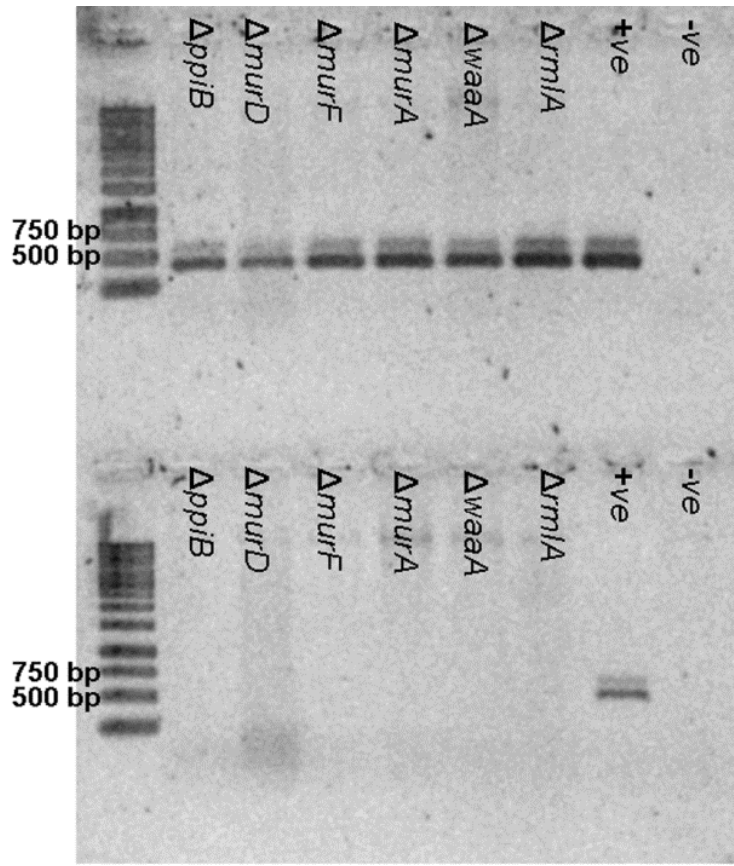

Supplement: pone.0186801.s001.pdf [file pone.0186801.s001.pdf]
